# Supplementary material for: Analysis of Arctic Spring Ozone Anomaly in the Phases of QBO and 11-year Solar Cycle for 1979–2011
Source: Preprints.org preprint supplement (doi:10.20944/preprints202104.0057.v1), 2021-04-02
Supplement: Supplementary file 1 [file supplementary]

Supporting Information for

“Analysis of Arctic spring ozone anomaly in the phases of QBO and 11-year solar cycle for 1979–2011” by

Yousuke Yamashita1,2, Hideharu Akiyoshi1, and Masaaki Takahashi1,3

1National Institute for Environmental Studies

2Japan Agency for Marine-Earth Science and Technology

3Atmosphere and Ocean Research Institute, The University of Tokyo

**Contents of this file**

Figure S1

Figure S2

Figure S3

**Introduction**

Figures S1, S2, and S3, are supplied to support Figures 7, 8, and 12, respectively.


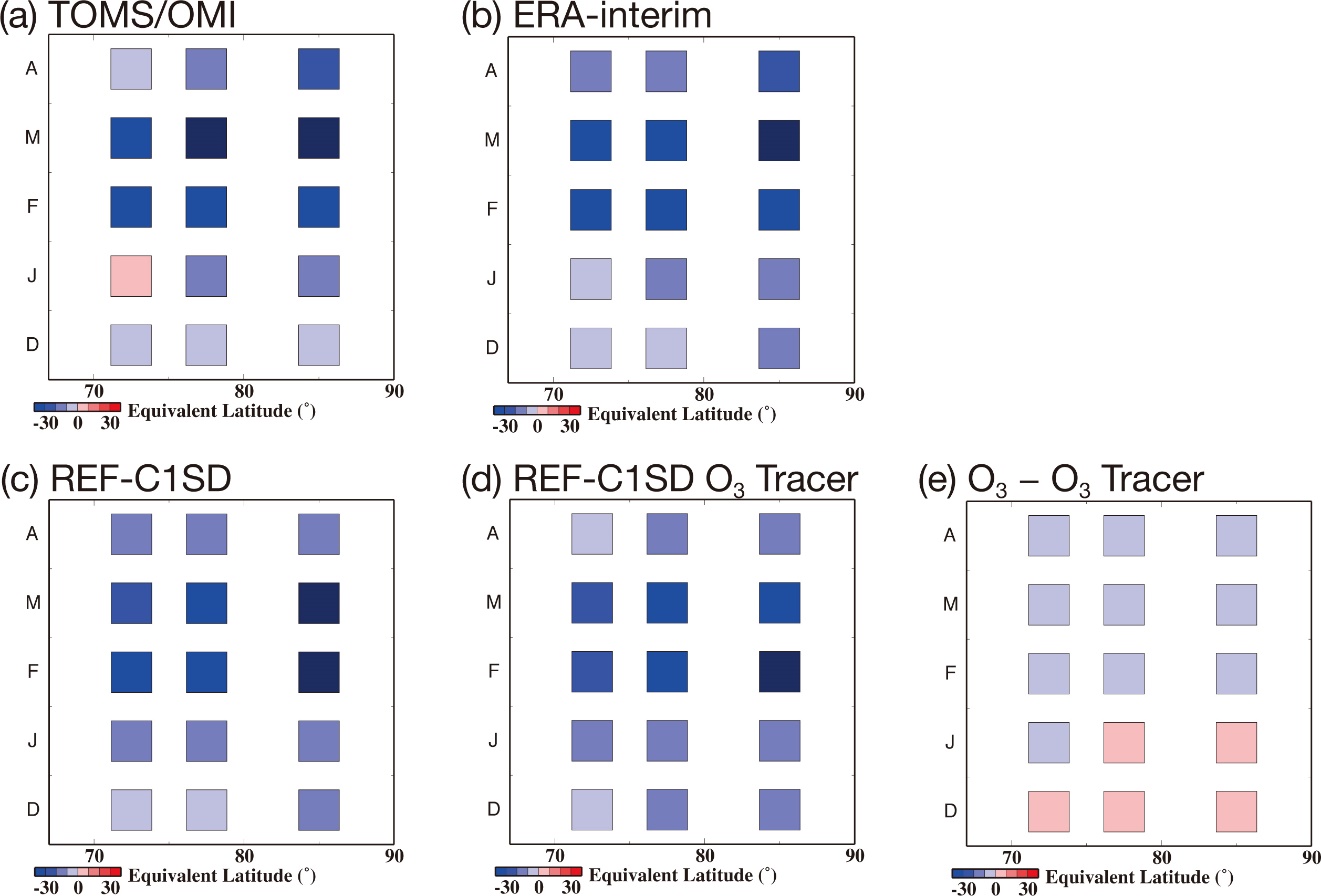


Figure S1. Same as Figure 7, but for the anomalies without 2009.


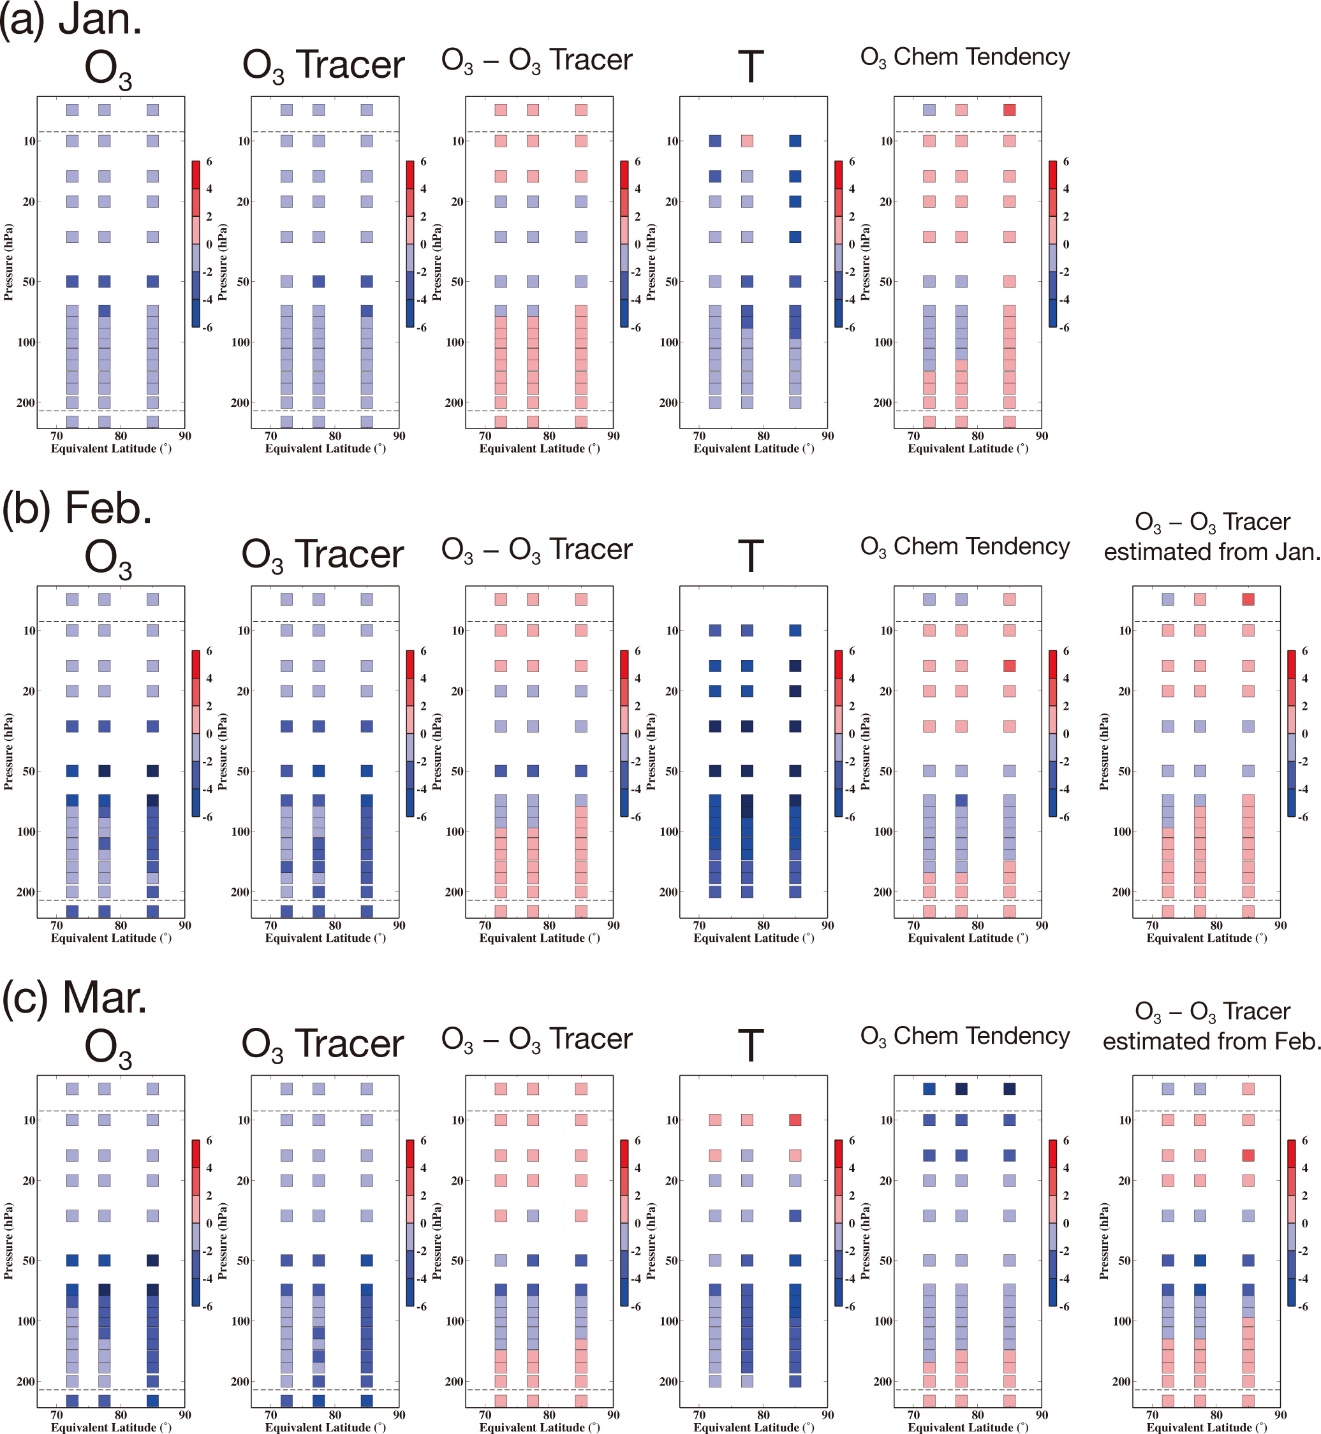


Figure S2. Same as Figure 8, but for the partial column mean anomaly without 2009.


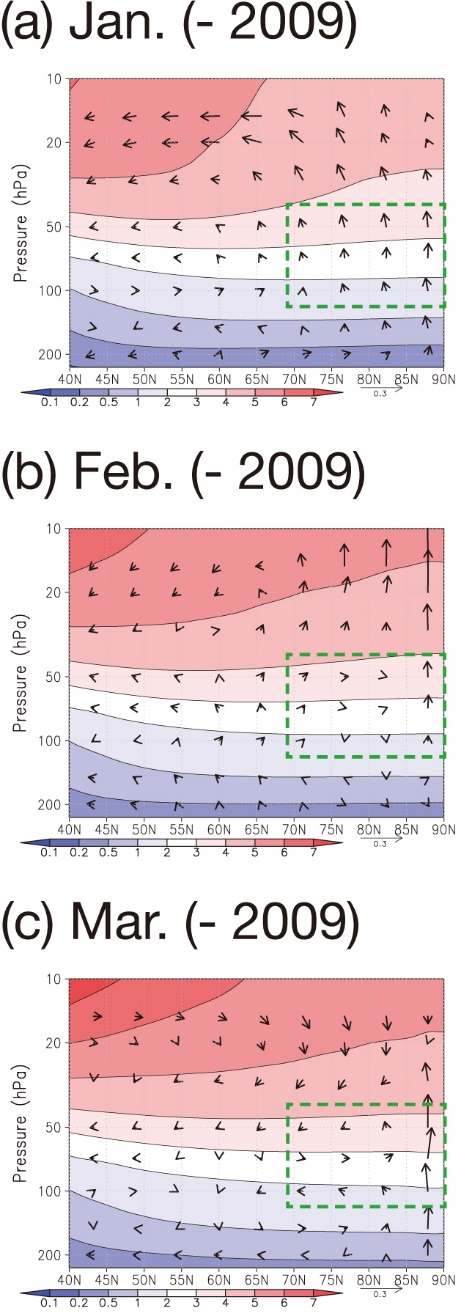


Figure S3. (a) The residual mean meridional circulation anomaly for QBO-W/Smin in January, but for anomalies without 2009. The vertical component of the residual circulation is magnified 200 times relative to the horizontal component, and the scale for the horizontal vector is shown at the bottom right of the panel in units of m/s. The contours/shadings indicate ozone mixing ratio averaged for 1979–2011 with units of DU. (b) Same as (a), but for February. (c) Same as (a), but for March.
